# Supplementary material for: Alcohol-dysregulated miR-30a and miR-934 in head and neck squamous cell carcinoma
Source: Springer Nature journal article supplement (doi:10.1186/s12943-015-0452-8), 2015-10-15

**A**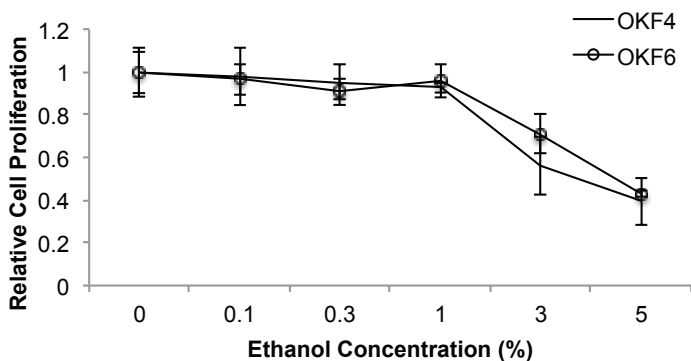**B**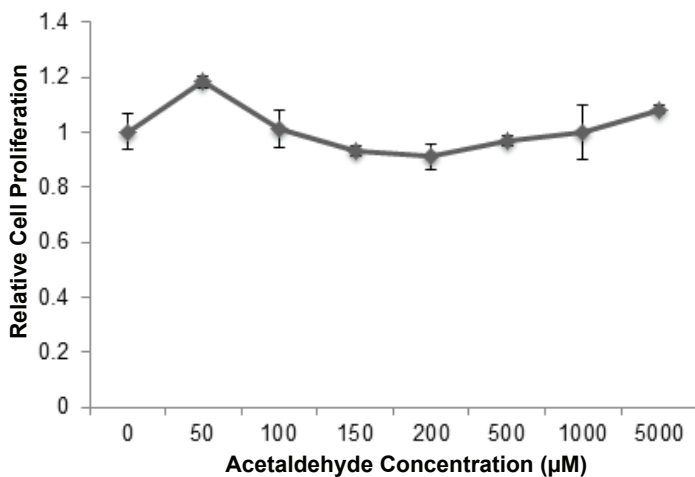**C**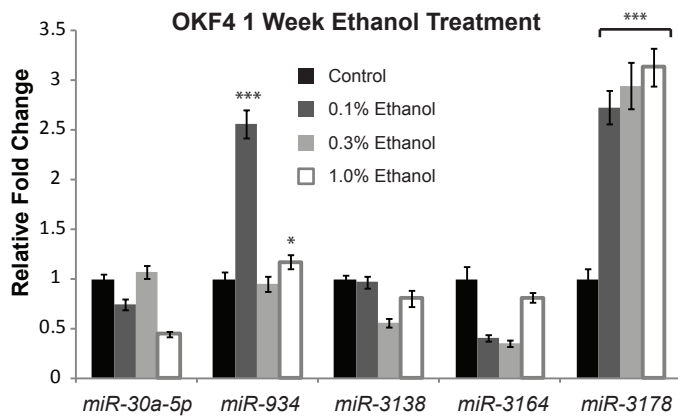

Supplement: MOESM1 [file 9763246]
